# Supplementary material for: Dibenzodiaza-30-crown-10-appended bis(zinc porphyrin) tweezers: synthesis and crown-assisted chiroptical behaviour
Source: Royal Society of Chemistry journal article supplement (doi:10.1039/b701317e), 2007-01-01
Supplement: b701317e.pdf [file b701317e.pdf]

## Electronic Supplementary Information

### Dibenzo-diaza-30-crown-10-appended bis(zinc porphyrin) tweezers: synthesis and crown-assisted chiroptical behavior

Yusuke Ishii, Toshiharu Yoshizawa, Yuji Kubo\*

Department of Applied Chemistry, Graduate School of Science and Technology, Saitama University,  
255 Shimo-ohkubo, Sakura-ku, Saitama 338-8570, Japan

E-mail; yuji@apc.saitama-u.ac.jp

Fax: +81-48-858-3514; Tel: +81-48-858-3514

#### Cooperative association model of association constant ( $K_a$ ) of $\mathbf{1}$ <sup>28</sup>

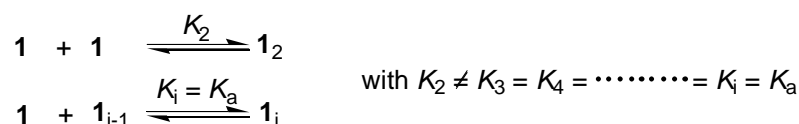

The concentration dependency of the chemical shift of N-CH<sub>3</sub> presented in Fig. 1, can now be described with Equation (1) and gives the association constants  $K_a$  and dimerization constant  $K_2$ .

$$\frac{(1-P_f)^{1/2}}{(2P_f-1)c^{1/2}} = K_2^{1/2} + K_a \frac{P_f [(1-P_f)c]^{1/2}}{2P_f-1} \quad (1)$$

with  $P_f = \frac{\delta_a - \delta_{\text{obs}}}{\delta_a - \delta_m}$

where  $P_f$ : the population fraction of free N-CH<sub>3</sub>;

$c$ : total concentration of  $\mathbf{1}$  (M);

$\delta_a$ : chemical shift of the fully associated state (2.01 ppm,  $c = 4.0 \times 10^{-2}$  M);

$\delta_m$ : chemical shift of the monomer (2.86 ppm,  $c = 5.0 \times 10^{-5}$  M);

$\delta_{\text{obs}}$ : observed chemical shift.

## Measurements

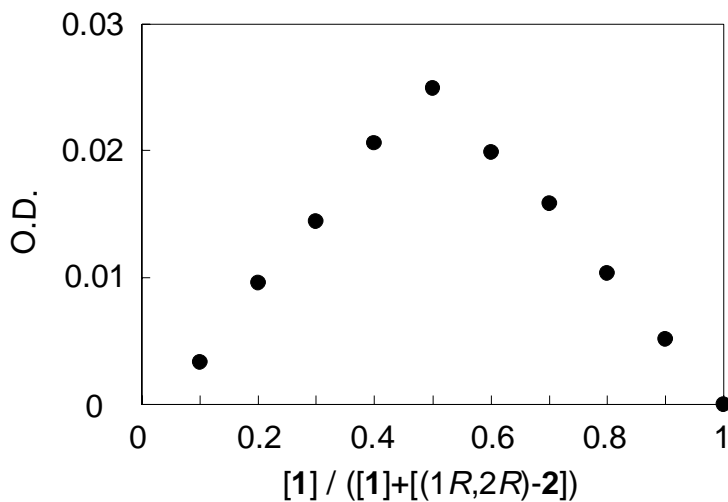

**Fig. S1** A Job Plot for the complex formation between **1** and (1*R*,2*R*)-**2**. The total concentration was kept at 2.0  $\mu$ M and the absorption intensity was monitoring by UV-Vis spectroscopy in  $\text{CH}_2\text{Cl}_2$ -MeCN at 25  $^\circ\text{C}$ .

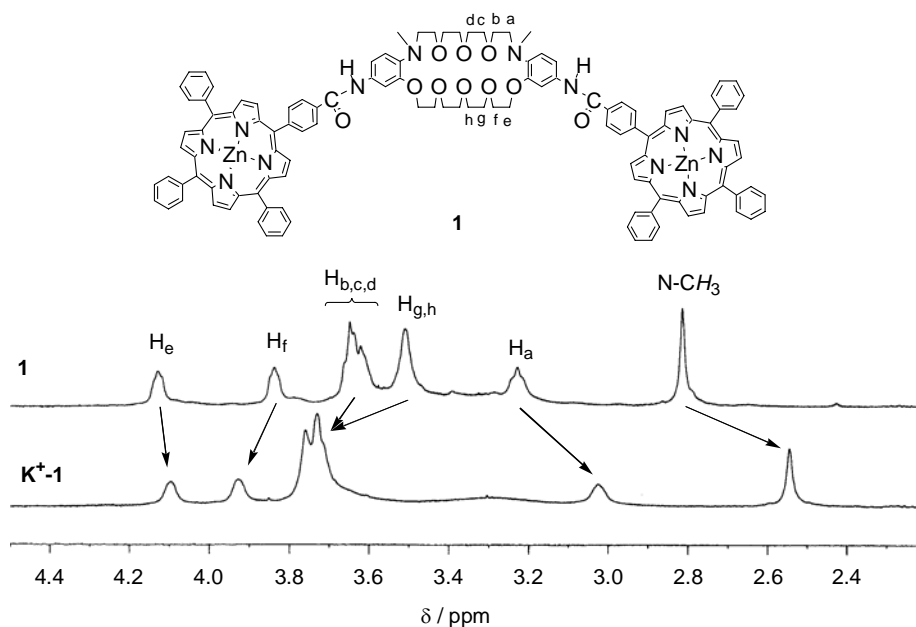

**Fig. S2**  $^1\text{H}$  NMR of crown ether region of **1** (a) and  $\text{K}^+$ -**1** complex (b) in  $\text{CD}_2\text{Cl}_2$ - $\text{CD}_3\text{CN}$  (4:1 v/v) at 23  $^\circ\text{C}$ . The  $\text{K}^+$ -**1** complex solution was obtained after solid[ $\text{KClO}_4$ ] – liquid[1.0 mM of **1**  $\text{CD}_2\text{Cl}_2$ - $\text{CD}_3\text{CN}$  (4:1 v/v)] two-phase extraction.

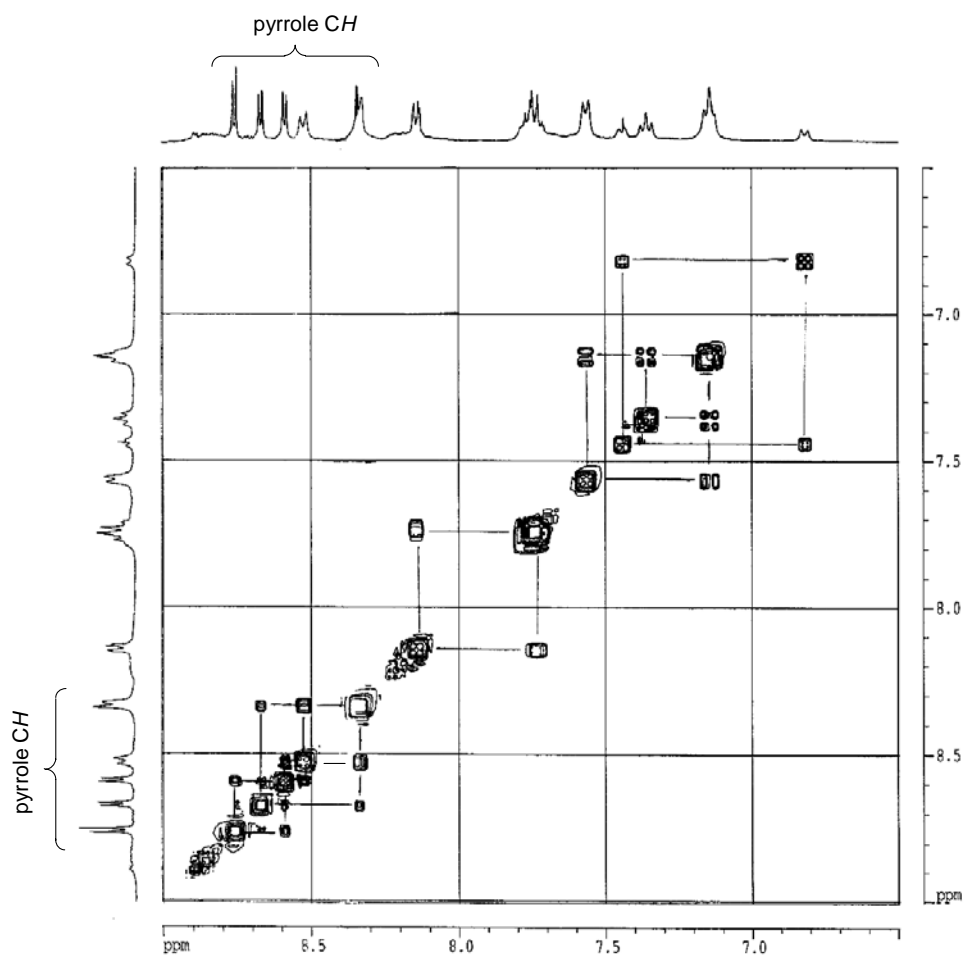

**Fig. S3** 2D COSY spectrum of  $K^+$ -1 complex. The solution was obtained after solid[ $KClO_4$ ] – liquid[1.0 mM of **1**  $CD_2Cl_2$ - $CD_3CN$  (4:1 v/v)] two-phase extraction.

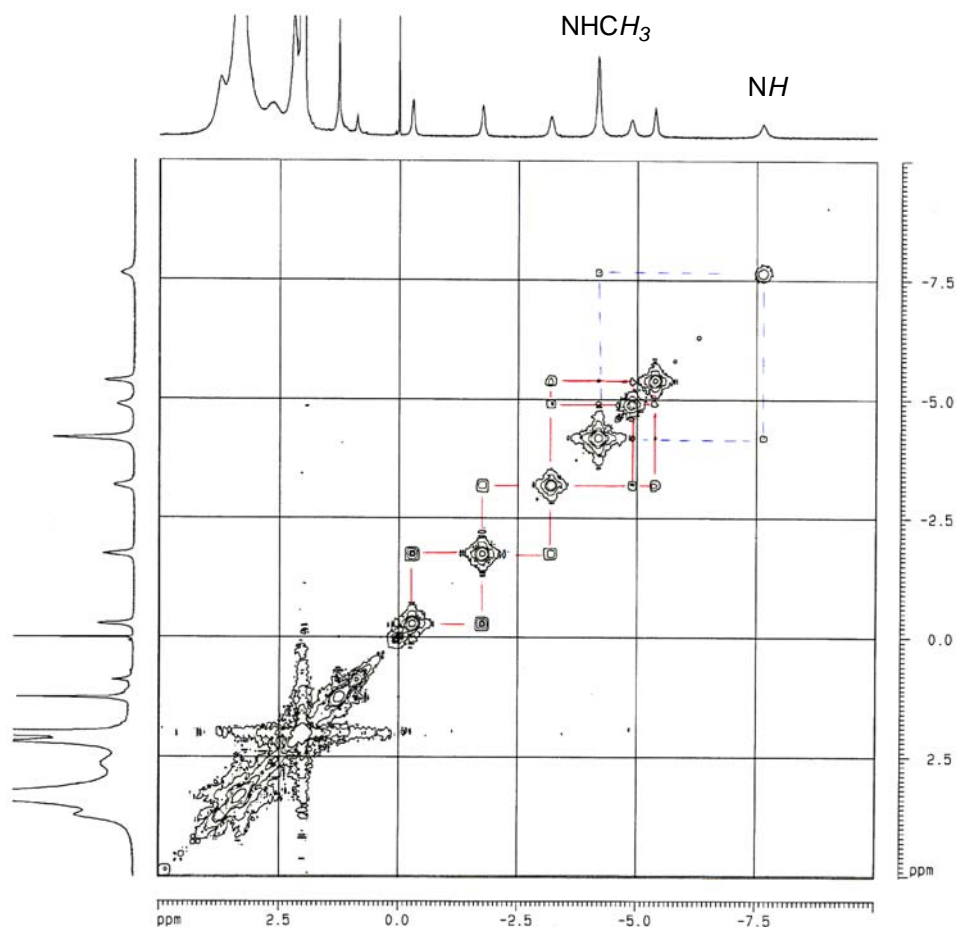

**Fig. S4** 2D COSY spectrum of  $K^+$ -**1**-(*1R,2R*)-**2** complex in  $CD_2Cl_2$ - $CD_3CN$  (4:1 v/v) at 23 °C. The solution was obtained after solid[ $KClO_4$ ] – liquid[10 mM of **1** and 5 mM of (*1R,2R*)-**2** in  $CD_2Cl_2$ - $CD_3CN$  (4:1 v/v)] two-phase extraction.

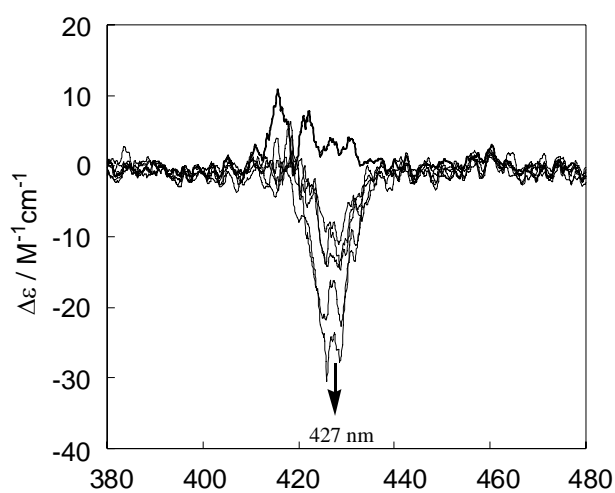

**Fig. S5** CD spectral changes of **1** upon adding L-Trp-OMe in  $CH_2Cl_2$  at 25 °C. [**1**] = 13  $\mu M$ . Optical length = 0.2 cm.
